# Supplementary material for: Quest for Novel Preventive and Therapeutic Options Against Multidrug-Resistant Pseudomonas aeruginosa
Source: Preprints.org preprint supplement (doi:10.20944/preprints202102.0579.v1), 2021-02-25
Supplement: Supplementary file 1 [file Supplementary Table S10.docx]

**Quest for novel preventive and therapeutic options against emerging multidrug resistant *Pseudomonas aeruginosa***

Sidra Iruma, Muhammad Ibrahim Rashid a, Mahnoor Majid, Amjad Ali, Saadia Andleeb*

Department of Industrial Biotechnology, Atta-ur-Rahman School of Applied Biosciences (ASAB), National University of Sciences & Technology (NUST), Islamabad, Pakistan.

**Supplementary Table S10:** MHC I & MHC II alleles tested in the study

| List of MHC I and MHC II Alleles Tested |
| --- |
| A0201 |
| H2Db |
| H2Kb |
| H2Kk |
| A0101 |
| A0202 |
| A0203 |
| A0206 |
| A0301 |
| A1101 |
| A3101 |
| A6801 |
| A6802 |
| B3501 |
| DRB0101 |
| DRB0401 |
| DRB0701 |
| IAb |
| IAk |
| IEg |
| IEk |
| IAd |
| IAs |
| IEd |
| TAP |
