# Supplementary material for: Quest for Novel Preventive and Therapeutic Options Against Multidrug-Resistant Pseudomonas aeruginosa
Source: Preprints.org preprint supplement (doi:10.20944/preprints202102.0579.v1), 2021-02-25
Supplement: Supplementary file 2 [file Supplementary Table S7.docx]

**Quest for novel preventive and therapeutic options against emerging multidrug resistant *Pseudomonas aeruginosa***

Sidra Iruma, Muhammad Ibrahim Rashid a, Mahnoor Majid, Amjad Ali, Saadia Andleeb*

Department of Industrial Biotechnology, Atta-ur-Rahman School of Applied Biosciences (ASAB), National University of Sciences & Technology (NUST), Islamabad, Pakistan.

**Supplementary Table S7:** List of screened essential drug targets.

| Sr. # | **UniProt**  **KB Ac** | **Host Homologue search** | | | **GI Number** | **Gene Name** | **3D structure search** | | | **Product Description** |
| --- | --- | --- | --- | --- | --- | --- | --- | --- | --- | --- |
|  |  | Query coverage | E-value | seq Identity |  |  | identity | PDB Accession | Structure building |  |
| 1 | G3XD23 | 40% | 8.00E-07 | 26% | 15598354 | wbpB |  |  | predicted | UDP-2-acetamido-2-deoxy-d-glucuronic acid  3-dehydrogenase, WbpB |
| 2 | Q51344 | No significant similarity found. | | | 15598313 | asd | 100% | 5BNT_C |  | aspartate semialdehyde dehydrogenase |
| 3 | Q9HV71 | No significant similarity found. | | | 15599922 | folK |  |  | predicted | 2-amino-4-hydroxy-6-hydroxymethyldihydropteridine pyrophosphokinase |
| 4 | Q9HUH7 | No significant similarity found. | | | 15600181 | waaA | No suitable template | | | 3-deoxy-D-manno-octulosonic-acid (KDO) transferase |
| 5 | Q9I7B7 | No significant similarity found. | | | 15595207 | glyQ |  |  | predicted | glycyl-tRNA synthetase alpha chain |
| 6 | Q9HVM3 | No significant similarity found. | | | 15599757 | ribF |  |  | predicted | riboflavin kinase/FAD synthase |
| 7 | Q9I2V5 | No significant similarity found. | | | 15596984 | acnB |  |  | predicted | aconitate hydratase 2 |
| 8 | G3XD85 | No significant similarity found. | | | 15598345 | wbpH | No suitable template | | | probable glycosyltransferase WbpH |
| 9 | Q9HXY6 | No significant similarity found. | | | 15598842 | lpxD | 100% | 3PMO_A |  | UDP-3-O-[3-hydroxylauroyl] glucosamine N-acyltransferase |
